# Supplementary material
Source: Springer Nature journal article supplement (https://www.springermedizin.de/resource/supplementary/12885_2013_4237_MOESM1_ESM.pdf/9466260)

**i**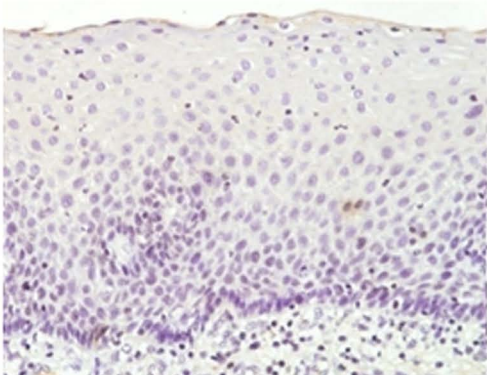**ii**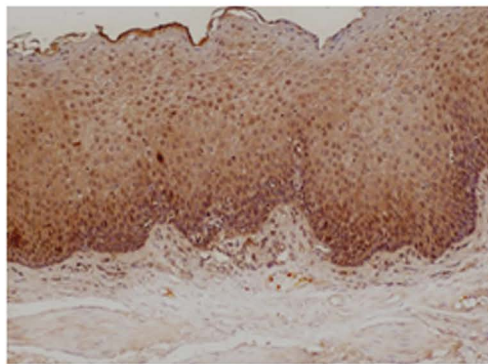**iii**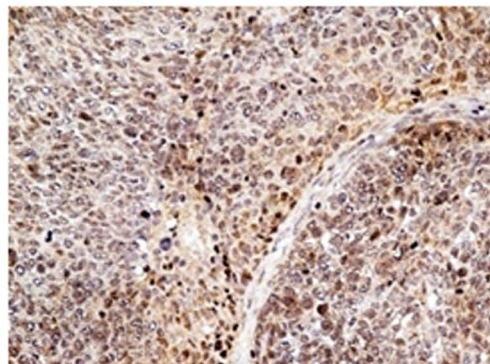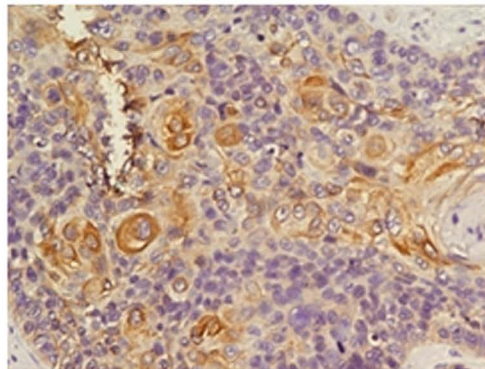**iv**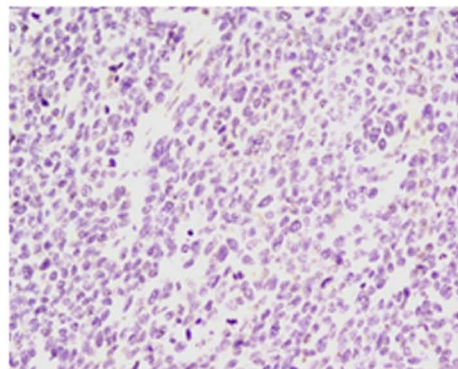**v**

Supplement: MOESM1 [file 9466260]
